# Supplementary material for: Clinical and Molecular Epidemiology of Human Parainfluenza Viruses 1–4 in Children from Viet Nam
Source: PubMed Central journal article supplement (PMC5931535; doi:10.1038/s41598-018-24767-4), 2018-05-01

**Supplementary Table 1.** Name of virus, sampling date, HPIV genes sequenced per sample and accession numbers respectively. Parentheses indicate partial genome sequences.

| <b>Virus Name</b>      | <b>Sampling Date</b> | <b>Genes</b>                | <b>Accession Number</b> |
|------------------------|----------------------|-----------------------------|-------------------------|
| HPIV1/VietNam/002/2009 | 2009-02-10           | (HN)                        | MH006614                |
| HPIV1/VietNam/004/2009 | 2009-03-09           | (P/C), (M), (F), (HN), (L)  | MH006615                |
| HPIV1/VietNam/005/2009 | 2009-04-02           | (HN)                        | MH006616                |
| HPIV1/VietNam/006/2009 | 2009-11-23           | (N), (P/C), M, F, HN, L     | MH006617                |
| HPIV1/VietNam/061/2009 | 2009-06-10           | (N), (P/C), M, (F), HN, (L) | MH006618                |
| HPIV1/VietNam/062/2010 | 2010-01-27           | (F), HN, (L)                | MH006619                |
| HPIV1/VietNam/063/2010 | 2010-04-20           | (N), (P/C), M, F, HN, (L)   | MH006620                |
| HPIV1/VietNam/064/2010 | 2010-10-04           | (F), (HN), (L)              | MH006621                |
| HPIV1/VietNam/067/2010 | 2010-06-02           | (HN)                        | MH006622                |
| HPIV2/VietNam/008/2009 | 2009-07-30           | N, V/P, M, F, HN, L         | MH006623                |
| HPIV2/VietNam/014/2010 | 2010-01-27           | HN, (L)                     | MH006624                |
| HPIV2/VietNam/015/2010 | 2010-02-04           | (F), HN, (L)                | MH006625                |
| HPIV2/VietNam/068/2010 | 2010-03-03           | (N), (M), (F), (L)          | MH006626                |
| HPIV2/VietNam/069/2010 | 2010-03-18           | N, (V), (M), (F), HN, L     | MH006627                |
| HPIV2/VietNam/073/2010 | 2010-03-16           | (HN), (L)                   | MH006628                |
| HPIV3/VietNam/001/2010 | 2010-01-14           | N, P/C/D, M, F              | MH006629                |
| HPIV3/VietNam/016/2009 | 2009-03-16           | N, (P/C/D), M, F, HN, (L)   | MH006630                |
| HPIV3/VietNam/017/2009 | 2009-03-30           | N, P/C/D, M, F, HN, L       | MH006631                |
| HPIV3/VietNam/018/2009 | 2009-03-31           | N, M, F, (HN), (L)          | MH006632                |
| HPIV3/VietNam/019/2009 | 2009-04-02           | N, P/C/D, M, F, HN, L       | MH006633                |
| HPIV3/VietNam/020/2009 | 2009-04-09           | N, P/C/D, M, F, HN, L       | MH006634                |
| HPIV3/VietNam/021/2009 | 2009-05-12           | N, P/C/D, M, F, HN, L       | MH006635                |
| HPIV3/VietNam/022/2009 | 2009-05-12           | N, (P/C/D), M, F, HN, L     | MH006636                |
| HPIV3/VietNam/023/2009 | 2009-06-01           | N, P/C/D, (L)               | MH006637                |
| HPIV3/VietNam/024/2009 | 2009-06-01           | N, P/C/D, M, F, HN, L       | MH006638                |
| HPIV3/VietNam/025/2009 | 2009-06-10           | N, P/C/D, M, F, HN, L       | MH006639                |
| HPIV3/VietNam/028/2009 | 2009-11-11           | N, (P/C/D), F, HN, L        | MH006640                |
| HPIV3/VietNam/029/2009 | 2009-11-24           | N, (P/C/D), M, F, HN, L     | MH006641                |
| HPIV3/VietNam/030/2009 | 2009-12-01           | N, (P/C/D), M, F, HN, L     | MH006642                |
| HPIV3/VietNam/032/2010 | 2010-01-05           | N, P/C/D, M, F, HN, (L)     | MH006643                |
| HPIV3/VietNam/035/2010 | 2010-01-18           | HN, (L)                     | MH006644                |
| HPIV3/VietNam/050/2009 | 2009-03-16           | HN, (L)                     | MH006645                |
| HPIV3/VietNam/051/2009 | 2009-03-17           | N, P/C/D, M, F, HN, L       | MH006646                |
| HPIV3/VietNam/052/2009 | 2009-03-26           | N, P/C/D, M, F, HN, (L)     | MH006647                |
| HPIV3/VietNam/054/2009 | 2009-11-10           | HN, (L)                     | MH006648                |
| HPIV3/VietNam/057/2009 | 2009-12-22           | (HN), (L)                   | MH006649                |
| HPIV3/VietNam/058/2010 | 2010-01-04           | HN, (L)                     | MH006650                |
| HPIV3/VietNam/059/2010 | 2010-01-06           | (F), (L)                    | MH006651                |
| HPIV3/VietNam/060/2010 | 2010-01-11           | (L)                         | MH006652                |
| HPIV3/VietNam/072/2010 | 2010-06-22           | HN, (L)                     | MH006653                |
| HPIV3/VietNam/074/2009 | 2009-11-05           | N, P/C/D, M, F, HN, L       | MH006654                |

|                        |            |                             |          |
|------------------------|------------|-----------------------------|----------|
| HPIV3/VietNam/075/2009 | 2009-11-27 | N, P/C/D, M, F, (L)         | MH006655 |
| HPIV3/VietNam/076/2009 | 2009-12-09 | N, P/C/D, (L)               | MH006656 |
| HPIV3/VietNam/077/2009 | 2009-12-11 | (HN), (L)                   | MH006657 |
| HPIV3/VietNam/078/2009 | 2009-12-18 | N, P/C/D, M, F, HN, L       | MH006658 |
| HPIV3/VietNam/079/2009 | 2009-12-22 | N, P/C/D, M, F, HN, (L)     | MH006659 |
| HPIV3/VietNam/081/2009 | 2009-12-22 | N, P/C/D, M, F, (HN), (L)   | MH006660 |
| HPIV3/VietNam/082/2009 | 2009-12-28 | N, P/C/D, (F), (L)          | MH006661 |
| HPIV3/VietNam/083/2010 | 2010-01-11 | N, P/C/D, M, (L)            | MH006662 |
| HPIV3/VietNam/084/2010 | 2010-01-12 | P/C/D, M, F                 | MH006663 |
| HPIV3/VietNam/085/2010 | 2010-01-20 | N                           | MH006664 |
| HPIV3/VietNam/086/2010 | 2010-01-28 | N, P/C/D, M, F, HN, (L)     | MH006665 |
| HPIV3/VietNam/087/2010 | 2010-03-19 | N, (P/C/D), M, (L)          | MH006666 |
| HPIV3/VietNam/088/2010 | 2010-03-24 | N, P/C/D                    | MH006667 |
| HPIV3/VietNam/089/2010 | 2010-03-28 | N, P/C/D, F, (HN), (L)      | MH006668 |
| HPIV3/VietNam/090/2010 | 2010-04-06 | P/C/D, (L)                  | MH006669 |
| HPIV3/VietNam/092/2010 | 2010-04-20 | (N), P/C/D, M, F, HN, (L)   | MH006670 |
| HPIV3/VietNam/093/2010 | 2010-05-27 | N, P/C/D, M, F, HN, (L)     | MH006671 |
| HPIV3/VietNam/094/2010 | 2010-05-28 | N, P/C/D, M, F, HN, L       | MH006672 |
| HPIV3/VietNam/095/2010 | 2010-12-01 | N, (P/C/D), M, F, (HN), (L) | MH006673 |
| HPIV3/VietNam/096/2009 | 2009-12-28 | N, P/C/D, M, F, HN, L       | MH006674 |
| HPIV3/VietNam/097/2010 | 2010-03-19 | P/C/D, M, F, (HN)           | MH006675 |
| HPIV3/VietNam/098/2009 | 2009-12-10 | N, P/C/D, M, F, HN, L       | MH006676 |
| HPIV3/VietNam/099/2010 | 2010-01-05 | (HN), (L)                   | MH006677 |
| HPIV3/VietNam/100/2010 | 2010-01-22 | (HN), (L)                   | MH006678 |
| HPIV3/VietNam/101/2010 | 2010-03-17 | N, P/C/D, M, F, HN, (L)     | MH006679 |
| HPIV3/VietNam/102/2010 | 2010-12-28 | N, M, F, (L)                | MH006680 |
| HPIV4/VietNam/044/2009 | 2009-05-26 | (HN), (L)                   | MH006681 |
| HPIV4/VietNam/045/2009 | 2009-07-22 | (V/P), (HN), (L)            | MH006682 |
| HPIV4/VietNam/046/2009 | 2009-12-08 | (HN)                        | MH006683 |
| HPIV4/VietNam/112/2009 | 2009-05-28 | (N), (V/P), HN, (L)         | MH006684 |

---

**Supplementary Table 2.** Primer sequences used to amplify and sequence HPIV genomes.

| Fragment | PIV type and primer name             | Primer sequence                                              | Amplicon size |
|----------|--------------------------------------|--------------------------------------------------------------|---------------|
| F1.1     | HPIV1_F1_77F<br>HPIV1_F1.1_1575R     | ARGGACAAGTCACAGACATTTGA<br>CCTTCGTGCAATCTTGTTTTCTA           | 1498          |
| F1.2     | HPIV1_F1.2_1364F<br>HPIV1_F1_2971R   | CYATAGAAGTGGCAATTGATCATACA<br>TCTTCTACTTTATTCTCAAGTGATTTTTCA | 1607          |
| F2.1     | HPIV1_F2_2892F<br>HPIV1_F2.1_4598R   | CAAGTCATGATTTGCTAAGCGCA<br>CCAGATGACTAGATTCATATGTGGA         | 1706          |
| F2.2     | HPIV1_F2.2_4350F<br>HPIV1_F2_5976R   | AAGCTCAACTTCATGGTACACCTA<br>GCCTGGTATWTCTGATAAAATTGGTATT     | 1626          |
| F3.1     | HPIV1_F3_5750F<br>HPIV1_F3.1_7292R   | GCTCCAATCTGGGACTATAGGAG<br>GTTGCATGACTTCTCTATTAATTGTGT       | 1542          |
| F3.2     | HPIV1_F3.2_7155F<br>HPIV1_F3_9059R   | GAGACAATCACAGAATTAATCAGACA<br>AYCGGATAAGGTTCAAAAGTGTAAC      | 1904          |
| F4.1     | HPIV1_F4_8752F<br>HPIV1_F4.1_10370R  | TTAGGGTTAATGCCTGCTATTTG<br>RTCATTTAACCATCTCTCTGATTCTACA      | 1618          |
| F4.2     | HPIV1_F4.2_10199F<br>HPIV1_F4_11652R | TCTATCACCTAGGAAAGCAGCAT<br>TGCTGGATCACCTATATTTCTGACA         | 1453          |
| F5.1     | HPIV1_F5_11471F<br>HPIV1_F5.1_13099R | GCCAACAGGTATGTATATCATTAGGAAT<br>GCTGTGCATATACTAGTTGCTCT      | 1628          |
| F5.2     | HPIV1_F5.2_12965F<br>HPIV1_F5_14558R | GTTAATCTATGATCCTGATCCTCTCA<br>GGTATGCAATCCTGATCACACTATAAT    | 1593          |
| F6.1     | HPIV1_F6_14274F<br>HPIV1_F6.1_15061R | CTTGTGATCTCAACGGACAAAGA<br>AGCTTCTTATCTGCATCTTTTATCCTA       | 787           |
| F6.2     | HPIV1_F6.2_14809F<br>HPIV1_F6_15610R | TAGTTGAGAAAGCCAAAGTTCATGAT<br>CCAGACAAGAGTTTAAGAAATATCGATATA | 801           |
| F1.1     | HPIV2_F1_8F<br>HPIV2_F1.1_1536R      | GGAGAATAGATGGCATCGTTATATGA<br>TTGATCGTTGTCAATTCTGTCTCT       | 1528          |
| F1.2     | HPIV2_F1.2_1332F<br>HPIV2_F1_3666R   | AGACCTCACTGCAACCATAT<br>CAAATCCATACGTATTGATGAAAGTT           | 2334          |
| F2.1     | HPIV2_F2_3508F<br>HPIV2_F2.1_5243R   | ATCCAACCTCACCCAGTCAATC<br>TGGATTGAATTGAAGATGCAAGATT          | 1735          |
| F2.2     | HPIV2_F2.2_4896F<br>HPIV2_F2_6885R   | TTCAATCAAAGATAAGATCACTCATGT<br>CGGAAAATGATTCTACATGTCCTT      | 1989          |
| F3.1     | HPIV2_F3_6655F<br>HPIV2_F3.1_8154R   | TTAAGGTGTCGTAACGTCTC<br>ACTTGATAGGACGGTACCCATT               | 1499          |
| F3.2     | HPIV2_F3.2_7985F<br>HPIV2_F3_9714R   | CAAGTCATGATGGGTGCAGAA<br>TTAAGTTGTAGACACCCATATACTAAAG        | 1729          |
| F4.1     | HPIV2_F4_9594F<br>HPIV2_F4.1_11135R  | TAGGGCCAAGGATAGATAGATTGTT<br>TATCTCCTTGAACCATGCTCATT         | 1541          |
| F4.2     | HPIV2_F4.2_10921F<br>HPIV2_F4_12609R | ATCTACATTATATGTTGGTGATCCATTC<br>TCAAGTGCATCATTCCAGTTCA       | 1688          |
| F5.1     | HPIV2_F5_12441F<br>HPIV2_F5.1_14058R | ATCCACCCATCAGAGTTCATA<br>TCGAGAGATTCTGGATGTGGAA              | 1617          |
| F5.2     | HPIV2_F5.2_13880F<br>HPIV2_F5_15601R | CAAATTAGAGAATCAGACGAAGGA<br>TCATTGTTGTCATAATTCTTCGC          | 1730          |
| F1.1     | HPIV3_F1_54F<br>HPIV3_F1.1_1715R     | TTAGGATTAAGACATTGASTRGAAGG<br>CTTTAATCCTAAGTTTTTCTATTTMTTAT  | 1661          |
| F1.2     | HPIV3_F1.2_1600F                     | CAAACAGAACRAAYCAGGAYGAAATAG                                  | 2131          |

|      |                    |                                  |      |
|------|--------------------|----------------------------------|------|
|      | HPIV3_F1_3731R     | CTTTAATCCTAAGTTTTCTTATTTGTATATTG |      |
| F2.1 | HPIV3_F2_3330F     | TATATCGACATGCAGGARAYACAYTRGA     | 1566 |
|      | HPIV3_F2.1_4895R   | TTGACYTCTTTTTRTCTAAGTTTTTGAT     |      |
| F2.2 | HPIV3_F2.2_4714F   | CAAGAGTRGATGCAATTTTCCAACCYTC     | 2032 |
|      | HPIV3_F2_6746R     | TAACTTTACTCCTAAGTTTTTTRTAATTTAAT |      |
| F3.1 | HPIV3_F3_6362F     | AAAGAAGGAACYCTTRCATTCTAYACA      | 1486 |
|      | HPIV3_F3.1_7847R   | CATTYTCATTTATTGGRTGTTCAAGACCT    |      |
| F3.2 | HPIV3_F3.2_7622F   | AAGTYGATGAAAGATCAGAYTATGCATCAT   | 1803 |
|      | HPIV3_F3_9425R     | TTGTAATTTBGGATCTAAYTTRGCRCATG    |      |
| F4.1 | HPIV3_F4_9280F     | TGATACATCCAGAATTGGTTTTGATATT     | 1903 |
|      | HPIV3_F4.1_11182R  | GCTTGAGGAAGAATTCTCCCATCA         |      |
| F4.2 | HPIV3_F4.2_11011F  | ACAGAGTTAAGAARGAGATAGTTTATAA     | 1861 |
|      | HPIV3_F4_12871R    | ACATCTTTGAGYGGGTCTTTATCAT        |      |
| F5.1 | HPIV3_F5_12746F    | AGAAGATGAGTGTGTATTAAGAAAG        | 1884 |
|      | HPIV3_F5.1_14629R  | TCACTAGGTTCCATTATAGTACAATA       |      |
| F5.2 | HPIV3_F5.2_14427F  | ACRTAYTTGATTGGRGATGATGATGT       | 966  |
|      | HPIV3_F5_15392R    | GGCTYAARGATAAAGGTTAVGATATA       |      |
| F1.1 | HPIV4A_F1_122F     | MRGACCTTAAATAAAGTAGCTCAT         | 1387 |
|      | HPIV4A_F1.1_1590R  | TTGTGATCTGAGTTGGTTGAATCAAT       |      |
| F1.2 | HPIV4A_F1.2_1305F  | AACTTGAATAACTGATGAAGACAGAGT      | 1770 |
|      | HPIV4AB_F1_3075R   | CAAGTGTAATTGTATTGTCTTGATCAAC     |      |
| F2.1 | HPIV4AB_F2_2949F   | GAYCCTGGAGTCCCATCAAAAGTA         | 1619 |
|      | HPIV4A_F2.1_4568R  | ATGATCTCACAACCTATGGACCAAA        |      |
| F2.2 | HPIV4A_F2.2_4160F  | UACCUAGACCUGUACUAAACUU           | 1881 |
|      | HPIV4AB_F2_5987R   | CATYACTGAAGCTGCCGAGA             |      |
| F3.1 | HPIV4A_F3_5683F    | AGGCAGTTCGAGATCTTGCAA            | 1055 |
|      | HPIV4A_F3.1_6738R  | CUGUCAAUUUUAUAAGAUGCAGAGU        |      |
| F3.2 | HPIV4A_F3.2_7313F  | AACACACTTCTCAGCCCTGA             | 1401 |
|      | HPIV4AB_F3_8714R   | AAATGCACTCTGTATAAGTCTC           |      |
| F4.1 | HPIV4A_F4_8485F    | ATATCGCACCAGGGGTAGG              | 1731 |
|      | HPIV4A_F4.1_10216R | TTCTTACCTGGCTCCAATTGATTG         |      |
| F4.2 | HPIV4A_F4.2_9969F  | AAGCAATGAGGAACAAAAAGATAGA        | 1463 |
|      | HPIV4A_F4_11432R   | CAAWYAGTGATATCCATTTCCAGTA        |      |
| F5.1 | HPIV4A_F5_11049F   | AUGAUGUUUUCUCAGUUGAAGAGAGU       | 2017 |
|      | HPIV4A_F5.1_13066R | AGGACGTCTCATGATATTTGTTAAG        |      |
| F5.2 | HPIV4A_F5.2_12768F | AUGUGGCAAUAAAGACUAAAUAUAUUAUGG   | 1801 |
|      | HPIV4A_F5_14569R   | TGATCCAAGTAAGTATTTAAGAATTCCT     |      |
| F6.1 | HPIV4A_F6_14159F   | ACAUGGAAUGCAUUGCCUAUUAA          | 1592 |
|      | HPIV4A_F6.1_15751R | AGUGACACCAUUCUAAACACUU           |      |
| F6.2 | HPIV4A_F6.2_15536F | AGTGGTGCTTCTATGACATTGATA         | 1569 |
|      | HPIV4A_F6_17105R   | TAAGAGAGATCGATACCGAACGATA        |      |

**Supplementary Figure 1.** Dated trees of HPIV sequences with full isolate names indicated per type, HPIV1 (A), HPIV2 (B), HPIV3 (C), HPIV4 (D), corresponding to Figures 1A, 1B, 2A and 1C respectively in the main text.



A

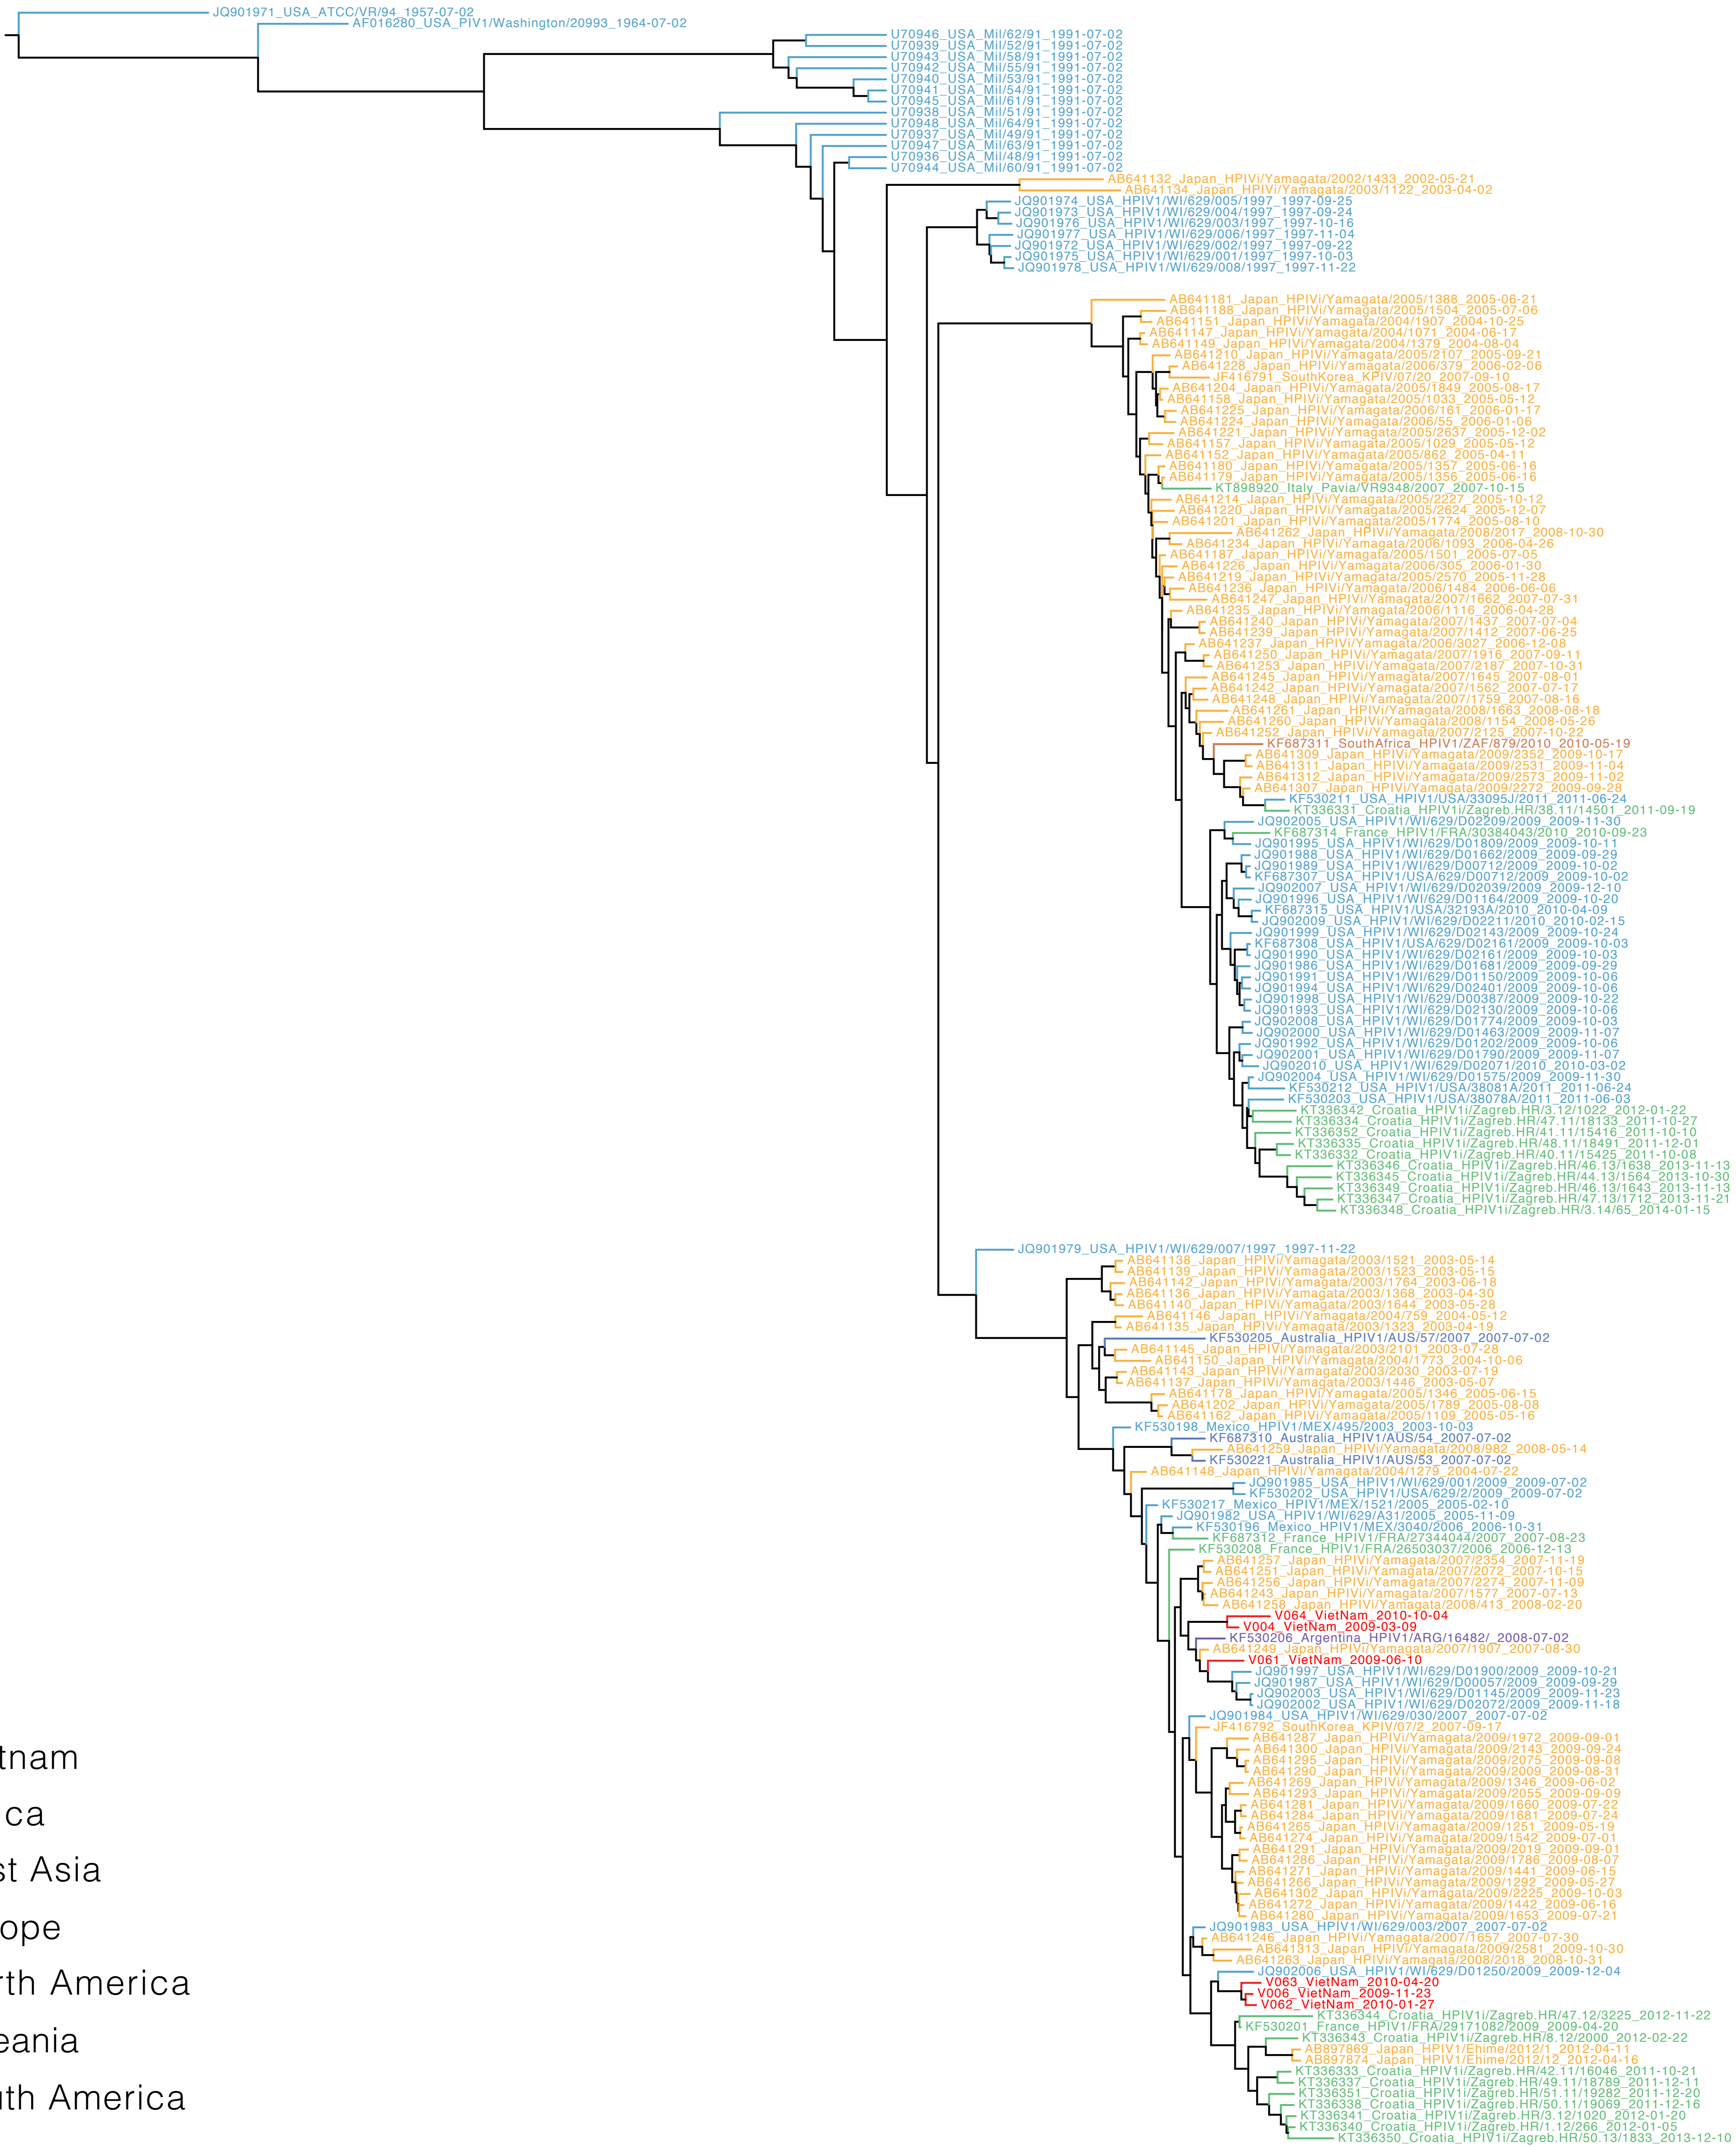

1940 1950 1960 1970 1980 1990 2000 2010

B

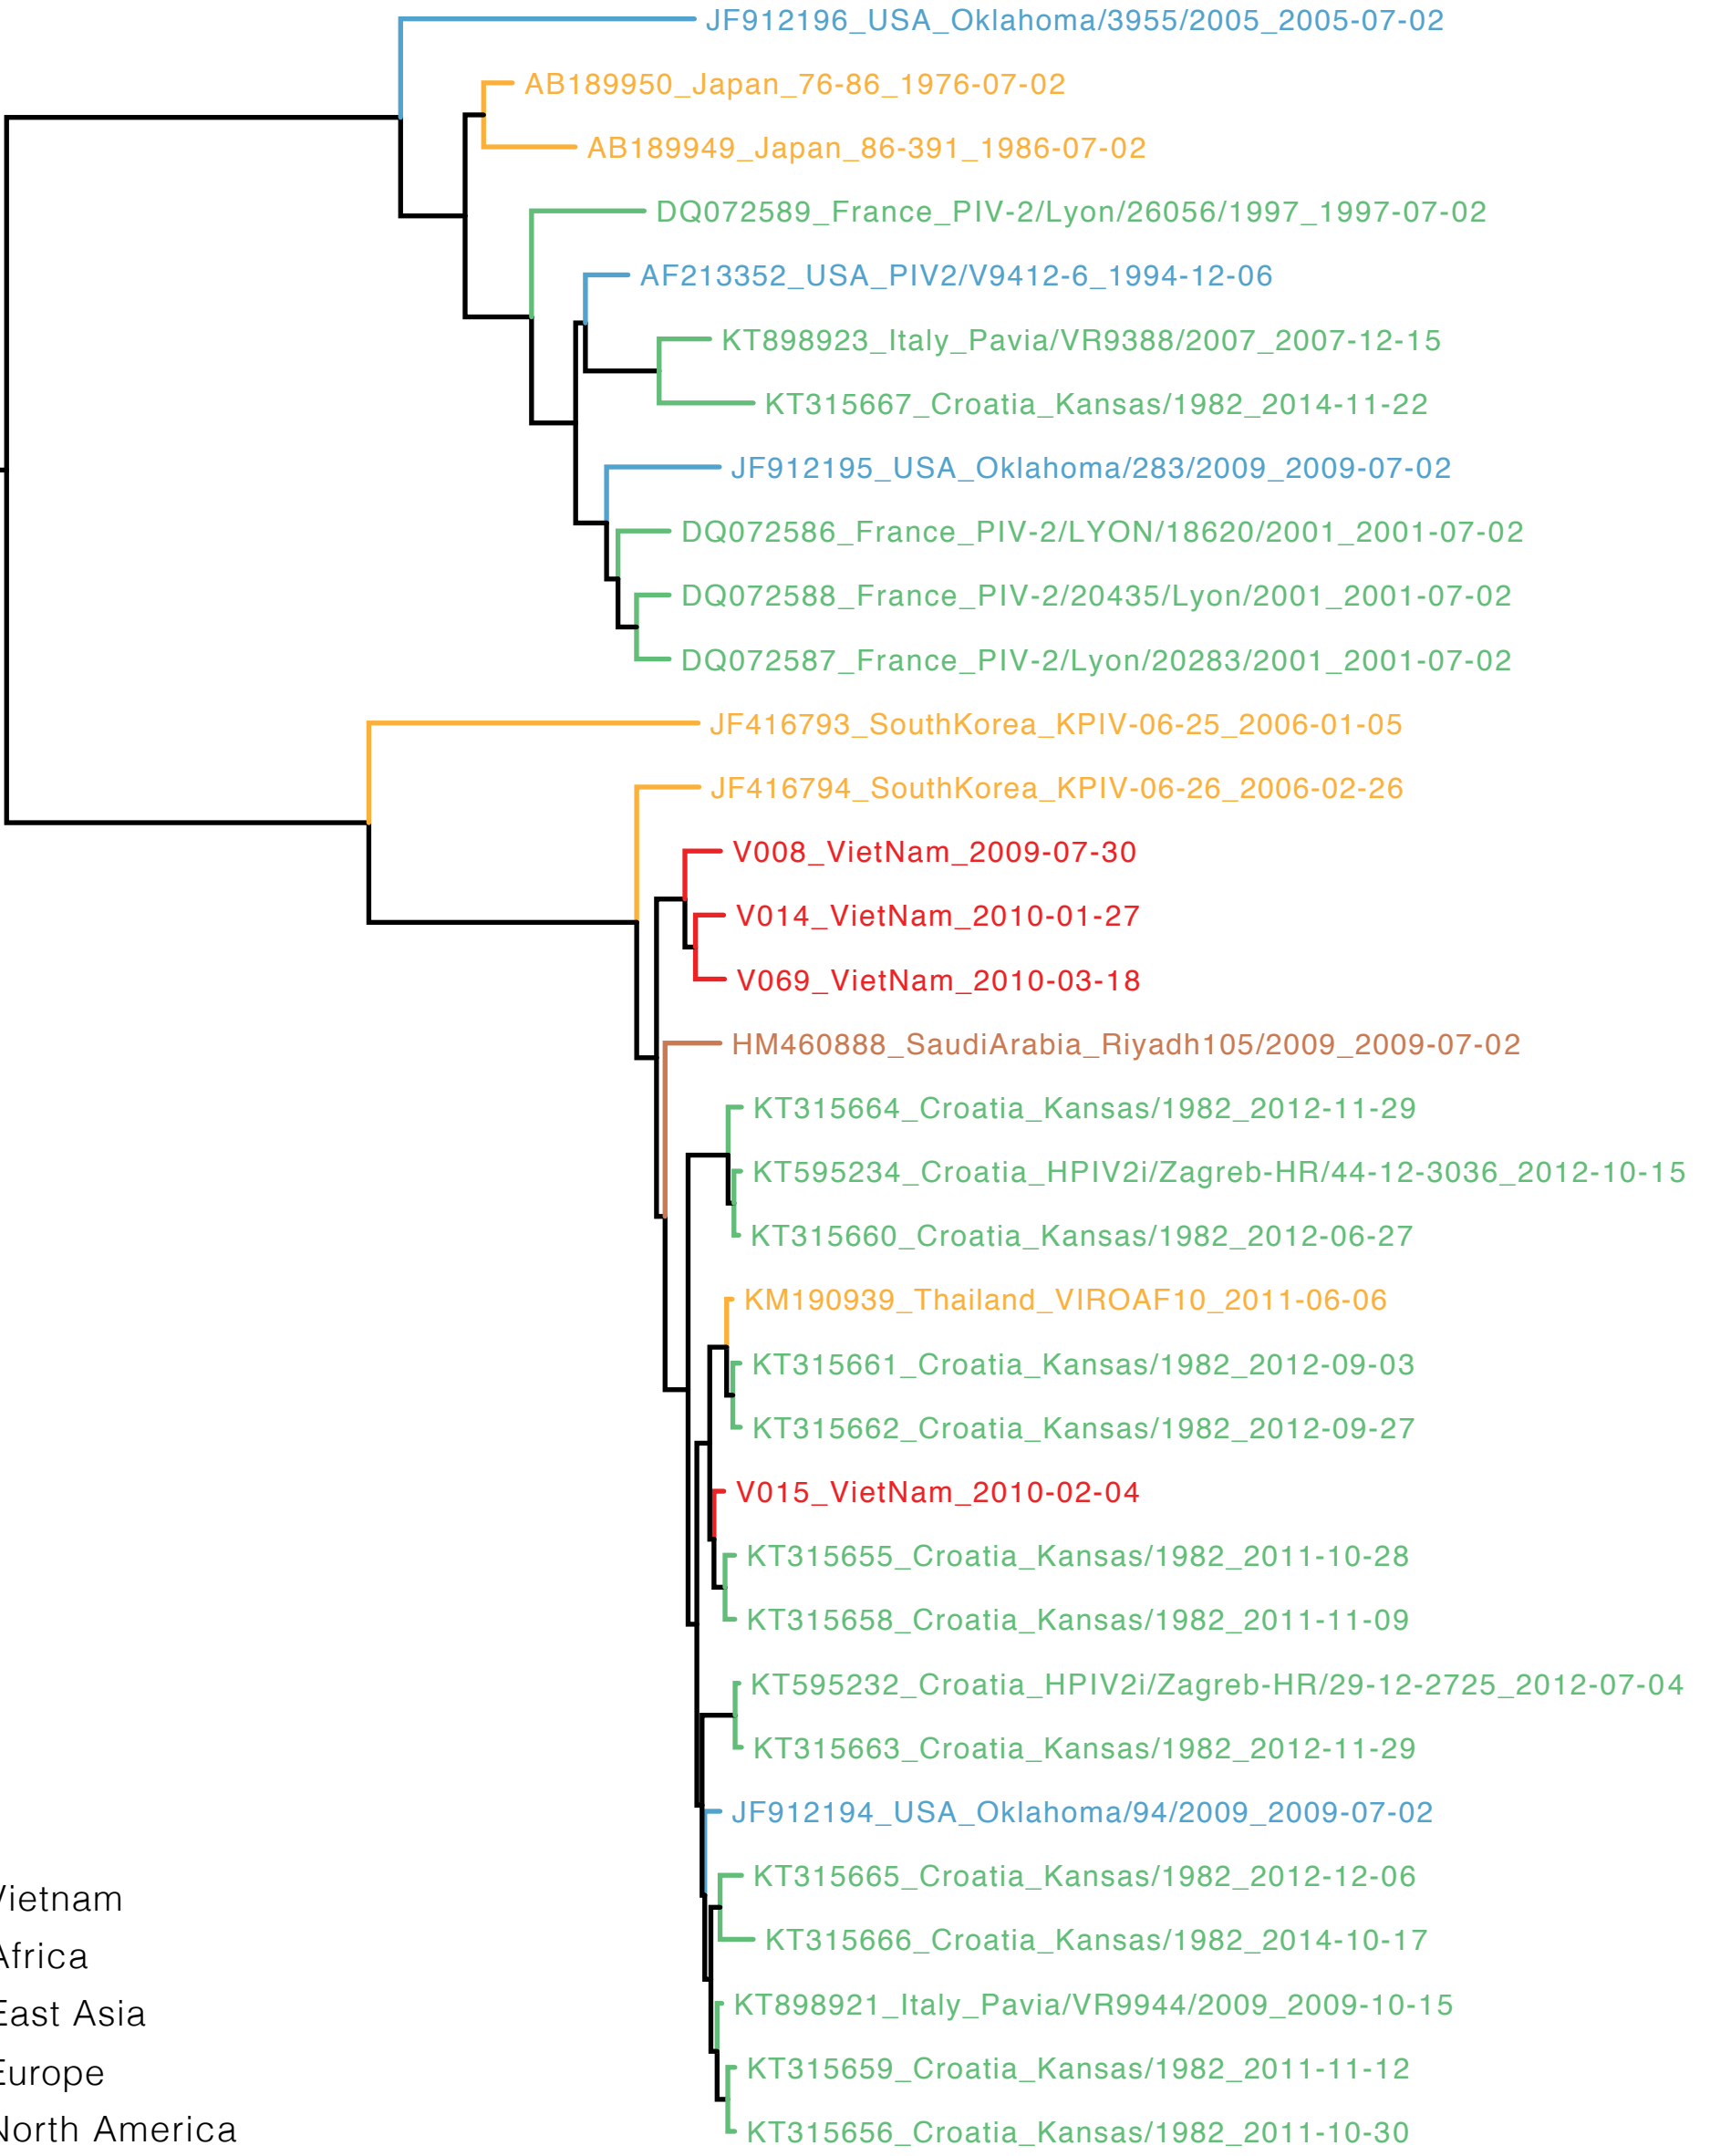

- Vietnam
- Africa
- East Asia
- Europe
- North America

1880 1900 1920 1940 1960 1980 2000



C

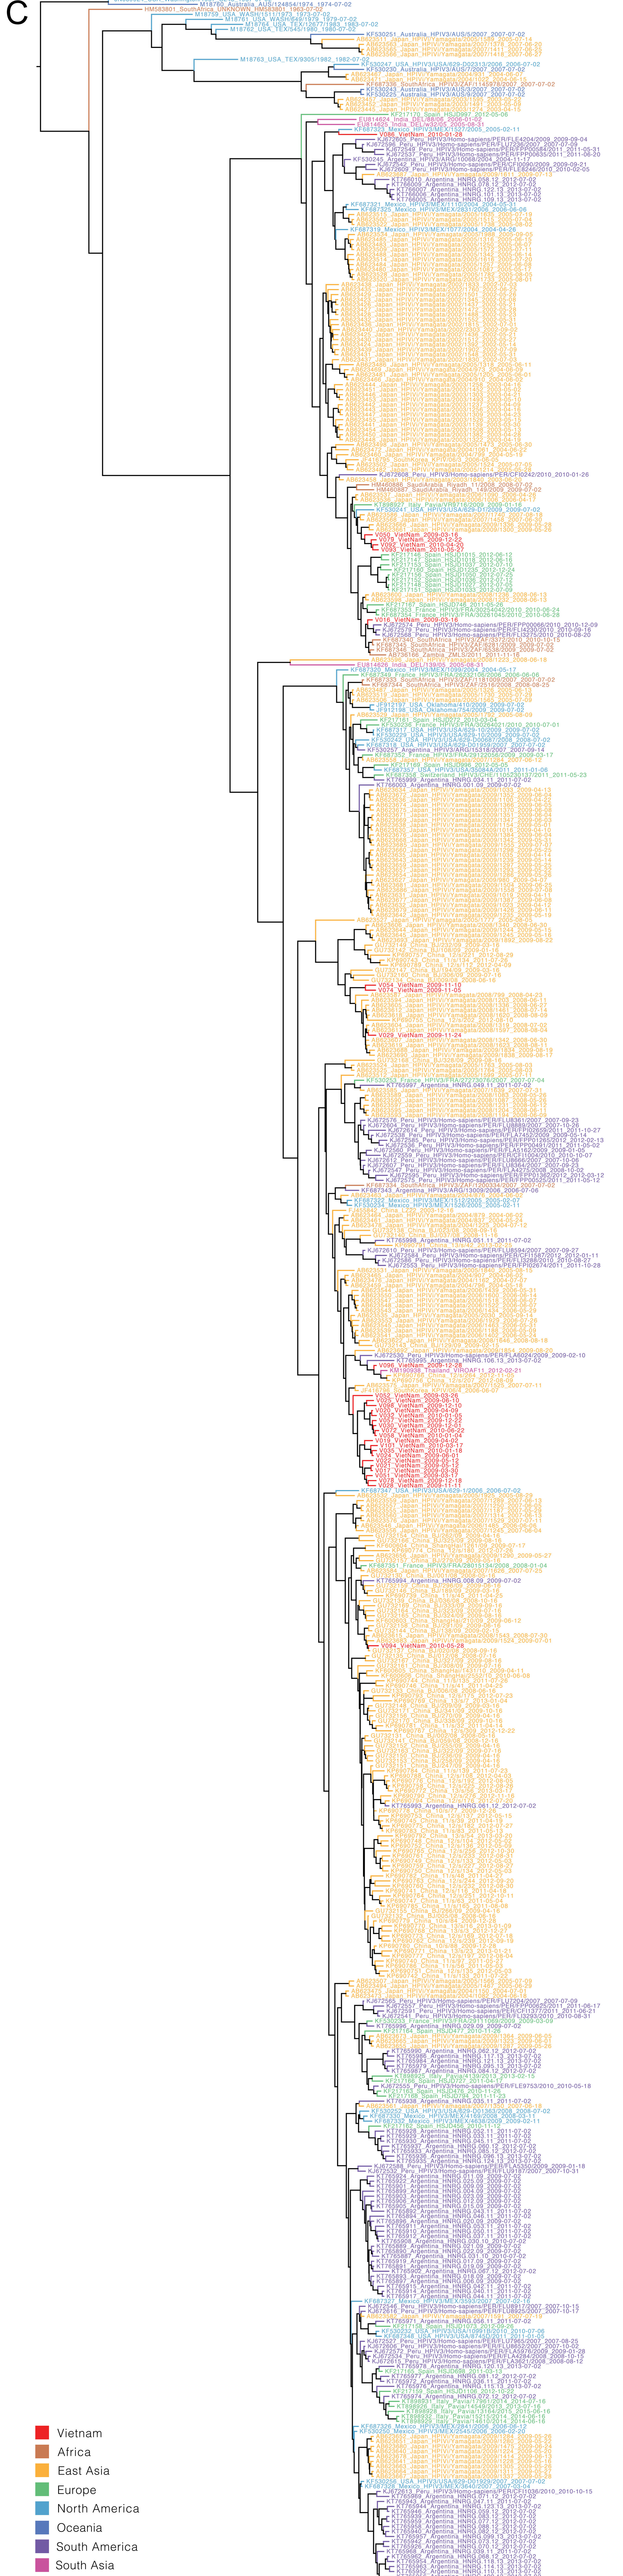

- Vietnam
- Africa
- East Asia
- Europe
- North America
- Oceania
- South America
- South Asia

1940 1950 1960 1970 1980 1990 2000 2010



D

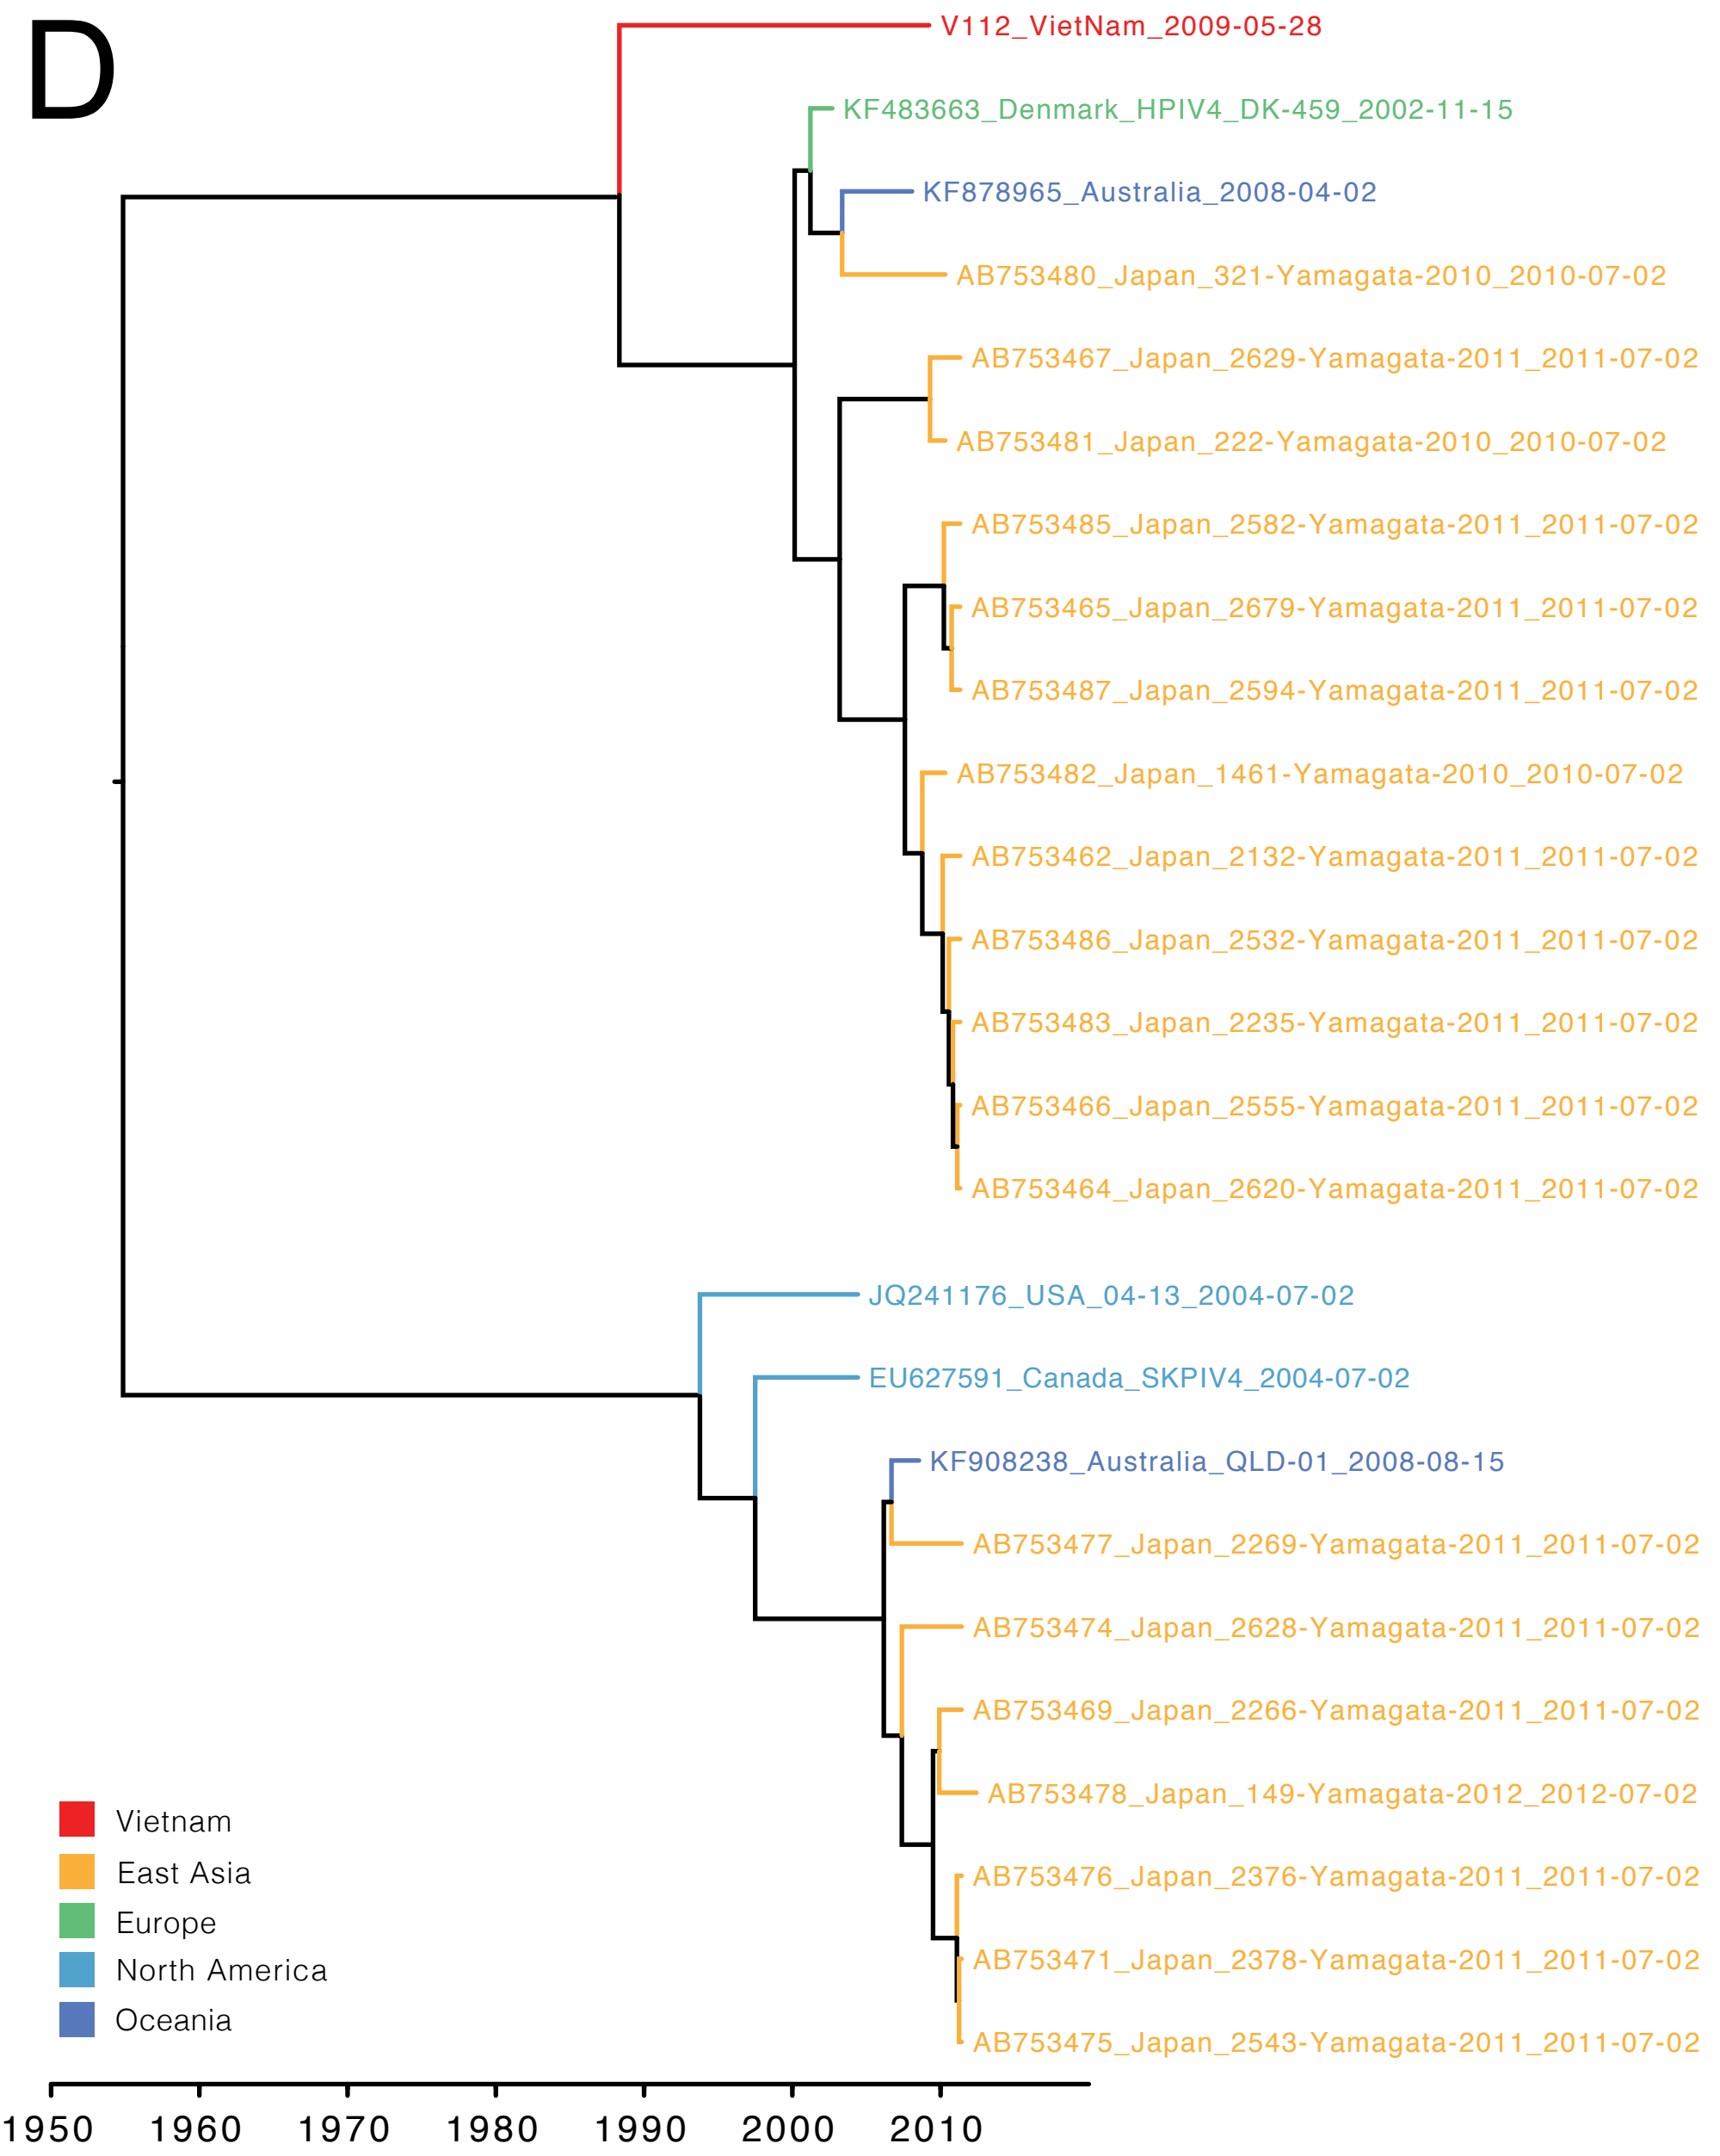

Supplement: 41598_2018_24767_MOESM1_ESM.pdf [file 41598_2018_24767_MOESM1_ESM.pdf]
